# Supplementary material
Source: publisher figshare collection journal article supplement (https://frontiersin.figshare.com/ndownloader/files/14738438)

A.

Ladder KO B6J-1 B6N-1 CRISPR B6J-2 B6N-2 CRISPR B6J-3 B6N-3

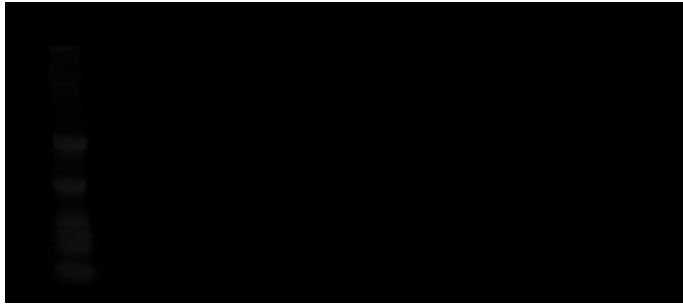

B.

Ladder KO B6J-1 B6N-1 CRISPR B6J-2 B6N-2 CRISPR B6J-3 B6N-3

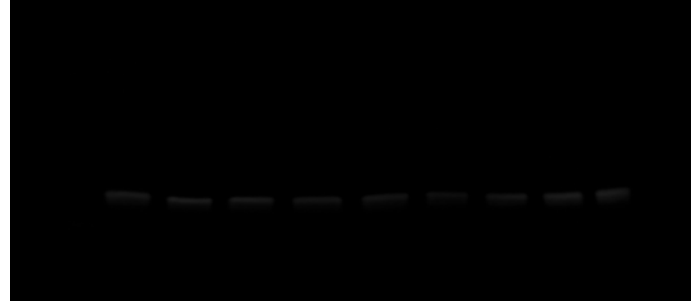

C.

Ladder KO B6J-1 B6N-1 CRISPR B6J-2 B6N-2 CRISPR B6J-3 B6N-3

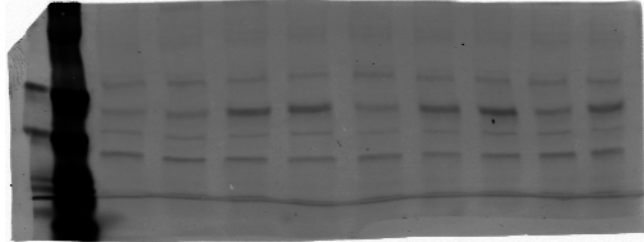

D.

Ladder KO B6J-1 B6N-1 CRISPR B6J-2 B6N-2 CRISPR B6J-3 B6N-3

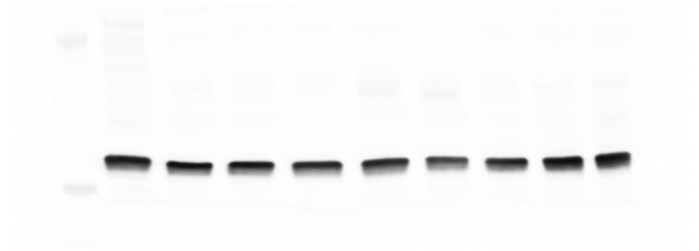

E.

Ladder KO B6J-1 B6N-1 CRISPR B6J-2 B6N-2 CRISPR B6J-3 B6N-3

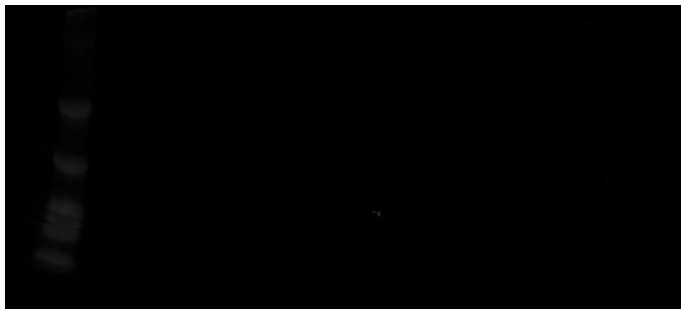

F.

Ladder KO B6J-1 B6N-1 CRISPR B6J-2 B6N-2 CRISPR B6J-3 B6N-3

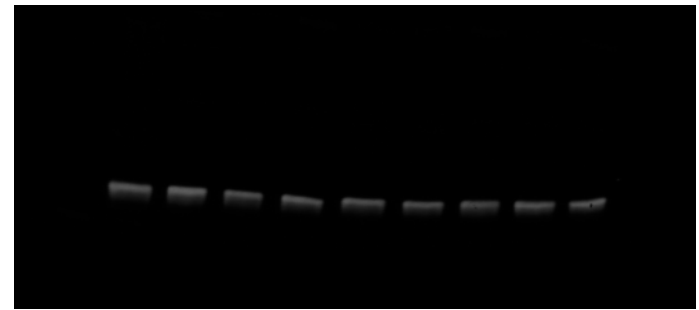

G.

Ladder KO B6J-1 B6N-1 CRISPR B6J-2 B6N-2 CRISPR B6J-3 B6N-3

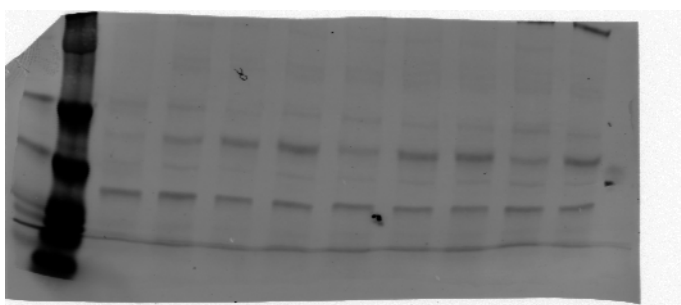

H.

Ladder KO B6J-1 B6N-1 CRISPR B6J-2 B6N-2 CRISPR B6J-3 B6N-3

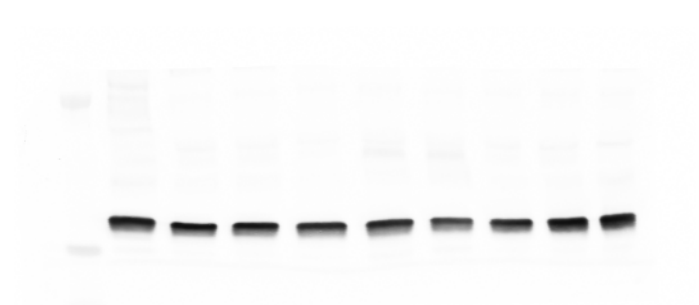

Supplement: Supplementary file [file 14738438]
